# Supplementary material
Source: MDPI journal article supplement (https://www.mdpi.com/2073-4395/12/8/1904)
Supplement: s1 [file s1 › agronomy-1863679-supplementary.pdf]

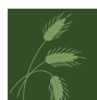

## Supplemental material

**Supplemental Table S1.** Physical and chemical characteristics of the soil sampled at two depths (0–0.3 m, 0.3–0.6 m) in 2019. Values are means  $\pm$  standard deviation of three samples ( $n=3$ ) collected in the FI, DI and RF plots (see Figure 1 for more information).

| Texture and chemical parameters                        | Soil depth      |                 |
|--------------------------------------------------------|-----------------|-----------------|
|                                                        | 0–0.3 m         | 0.3–0.6 m       |
| Sand (%)                                               | 71.8 $\pm$ 4.0  | 67.7 $\pm$ 2.7  |
| Silt (%)                                               | 12.3 $\pm$ 2.7  | 15.1 $\pm$ 1.1  |
| Clay (%)                                               | 15.9 $\pm$ 2.2  | 17.2 $\pm$ 1.7  |
| pH (water extract)                                     | 8.24 $\pm$ 0.09 | 8.21 $\pm$ 0.19 |
| Total organic carbon (%)                               | 0.61 $\pm$ 0.11 | 0.45 $\pm$ 0.05 |
| Soil organic matter (%)                                | 1.04 $\pm$ 0.18 | 0.77 $\pm$ 0.08 |
| Total nitrogen (%)                                     | 0.08 $\pm$ 0.01 | 0.06 $\pm$ 0.01 |
| C/N                                                    | 7.42 $\pm$ 0.62 | 7.79 $\pm$ 0.54 |
| Available P (mg kg <sup>-1</sup> )                     | 112 $\pm$ 40    | 88 $\pm$ 34     |
| Exchangeable K (mg K <sub>2</sub> O kg <sup>-1</sup> ) | 535 $\pm$ 139   | 330 $\pm$ 97    |
| Exchangeable Ca (mg CaO kg <sup>-1</sup> )             | 2121 $\pm$ 138  | 2140 $\pm$ 76   |
| Exchangeable Mg (mg MgO kg <sup>-1</sup> )             | 181 $\pm$ 6     | 209 $\pm$ 58    |
| Exchangeable Na (mg kg <sup>-1</sup> )                 | 61.2 $\pm$ 7.2  | 64.3 $\pm$ 8.9  |
| K/Mg                                                   | 1.27 $\pm$ 0.33 | 0.74 $\pm$ 0.35 |
| Ca/Mg                                                  | 5.03 $\pm$ 0.17 | 4.57 $\pm$ 1.00 |
| Cation exchange capacity (meq 100g <sup>-1</sup> )     | 10.9 $\pm$ 0.7  | 10.6 $\pm$ 0.4  |

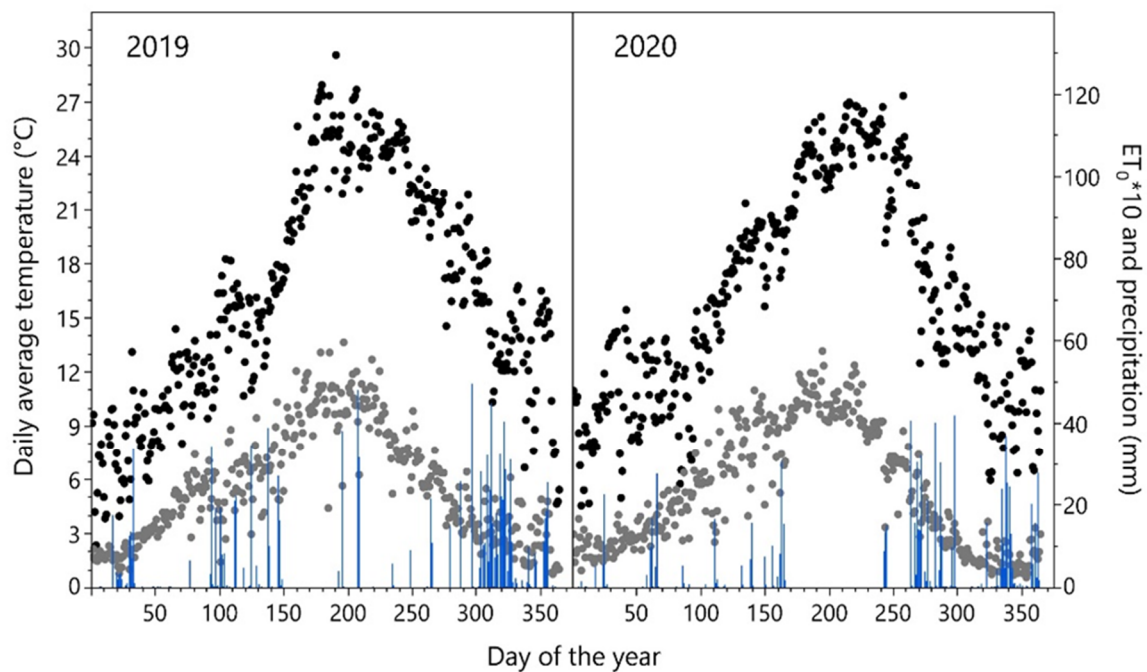

**Supplemental Figure S1.** Daily values of mean air temperature (°C, black dots), evapotranspiration (ET<sub>0</sub> mm x 10, grey dots) and precipitation (mm, histograms) at the experimental site in 2019 and 2020.

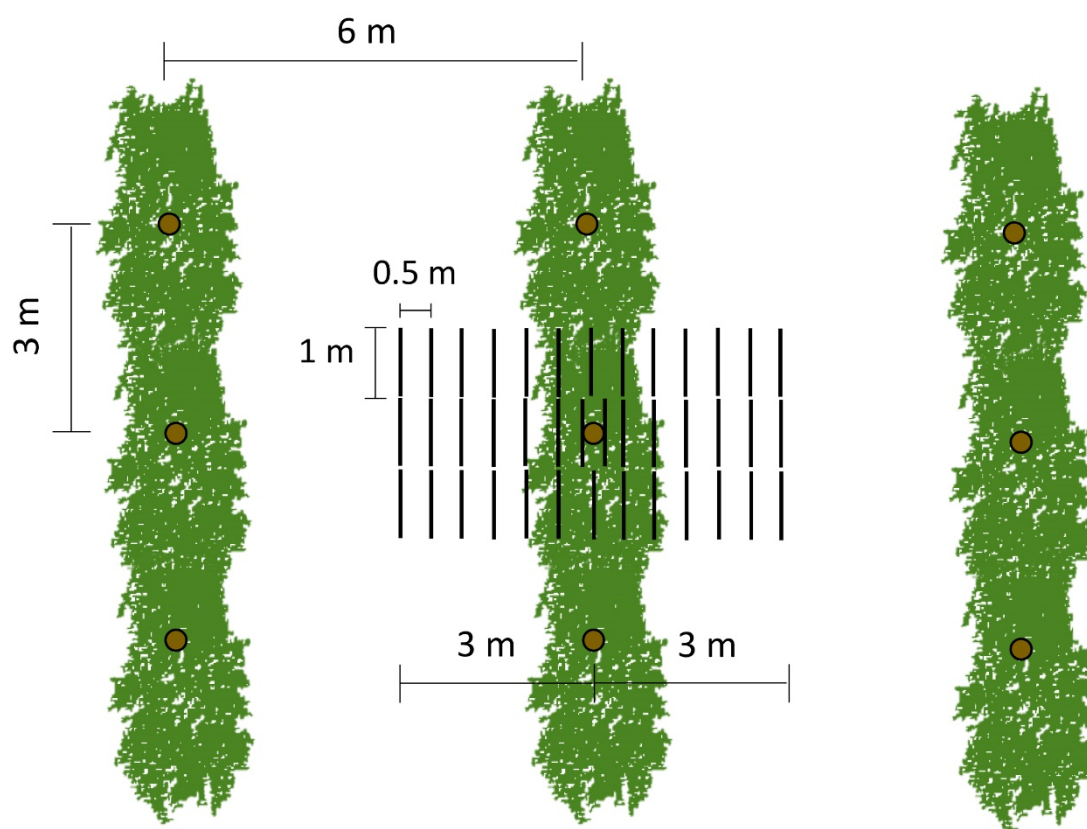

**Supplemental Figure S2.** Schematic representation of the procedure followed for the LAI measurements. Black lines indicate the position below the canopy and in the inter-row where the PAR was measured using a one-meter line quantum sensor array.
